# Supplementary material for: The neuroprotective effects of the combined extract of mulberry fruit and mulberry leaf against hydrogen peroxide-induced cytotoxicity in SH-SY5Y Cells
Source: Springer Nature journal article supplement (doi:10.1186/s12906-023-03930-z), 2023-04-13
Supplement: MOESM1 [file 12906_2023_3930_MOESM1_ESM.pdf]

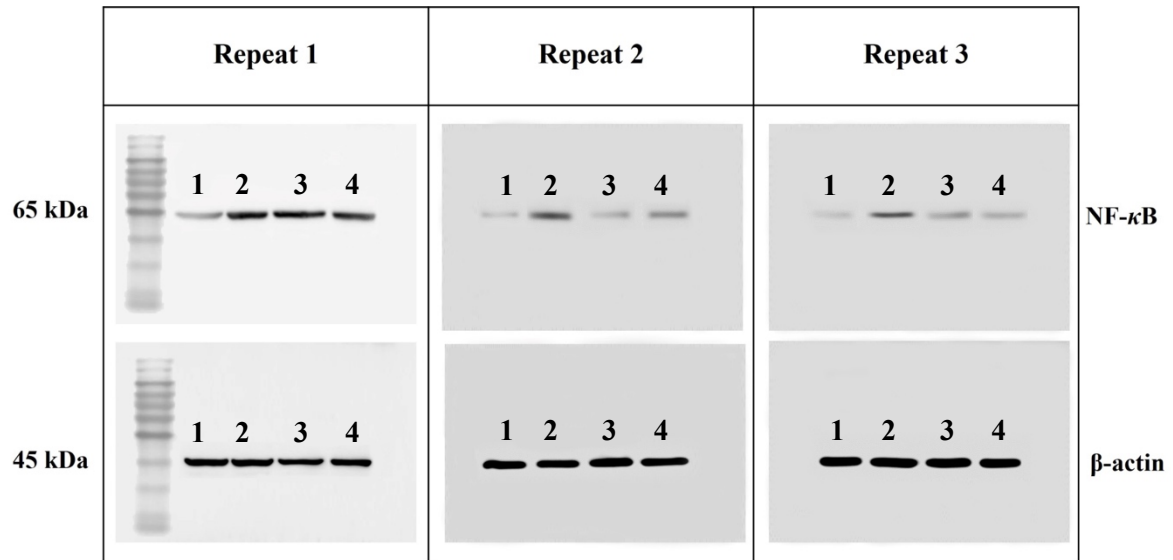

**Figure 4:** The expression of NF- $\kappa$ B in the hydrogen peroxide induced SH-SY5Y cell toxicity was detected by Western blotting. (1) naïve control, (2) H<sub>2</sub>O<sub>2</sub> + vehicle, (3) H<sub>2</sub>O<sub>2</sub> + MFML low dose, (4) H<sub>2</sub>O<sub>2</sub> + MFML high dose.

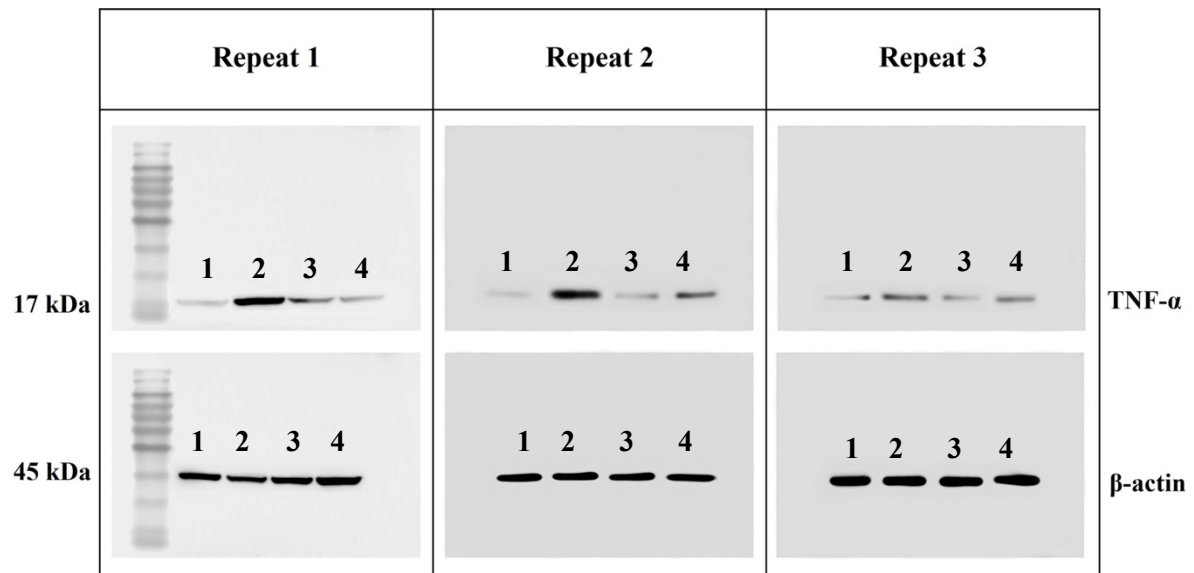

**Figure 5:** The expression of TNF- $\alpha$  in the hydrogen peroxide induced SH-SY5Y cell toxicity was detected by Western blotting. (1) naïve control, (2) H<sub>2</sub>O<sub>2</sub> + vehicle, (3) H<sub>2</sub>O<sub>2</sub> + MFML low dose, (4) H<sub>2</sub>O<sub>2</sub> + MFML high dose.

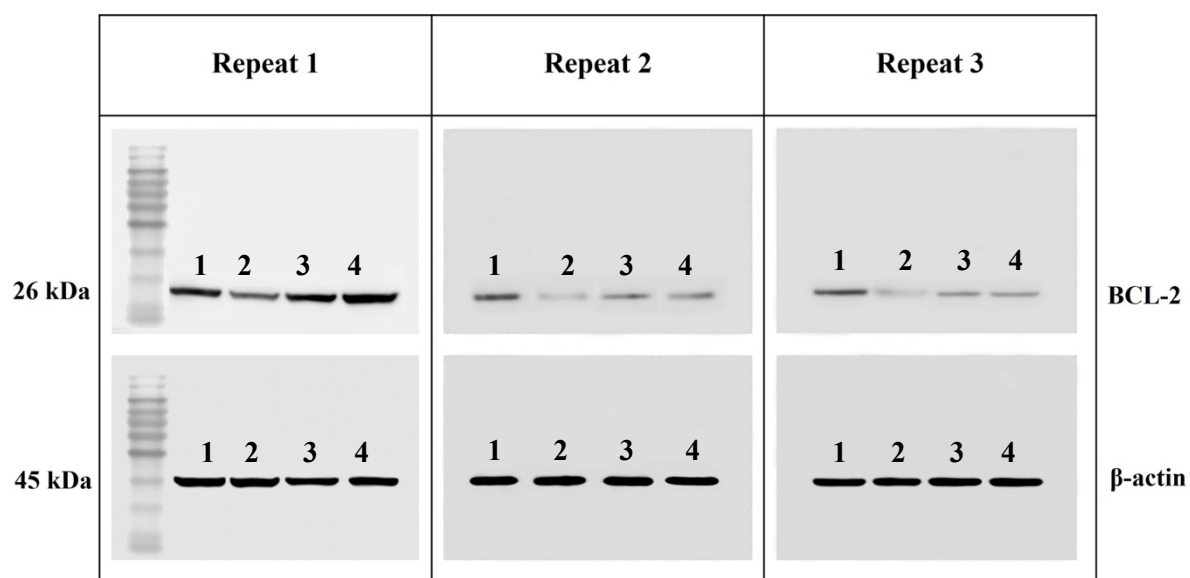

**Figure 6:** The expression of BCL-2 in the hydrogen peroxide induced SH-SY5Y cell toxicity was detected by Western blotting. (1) naïve control, (2) H<sub>2</sub>O<sub>2</sub> + vehicle, (3) H<sub>2</sub>O<sub>2</sub> + MFML low dose, (4) H<sub>2</sub>O<sub>2</sub> + MFML high dose.

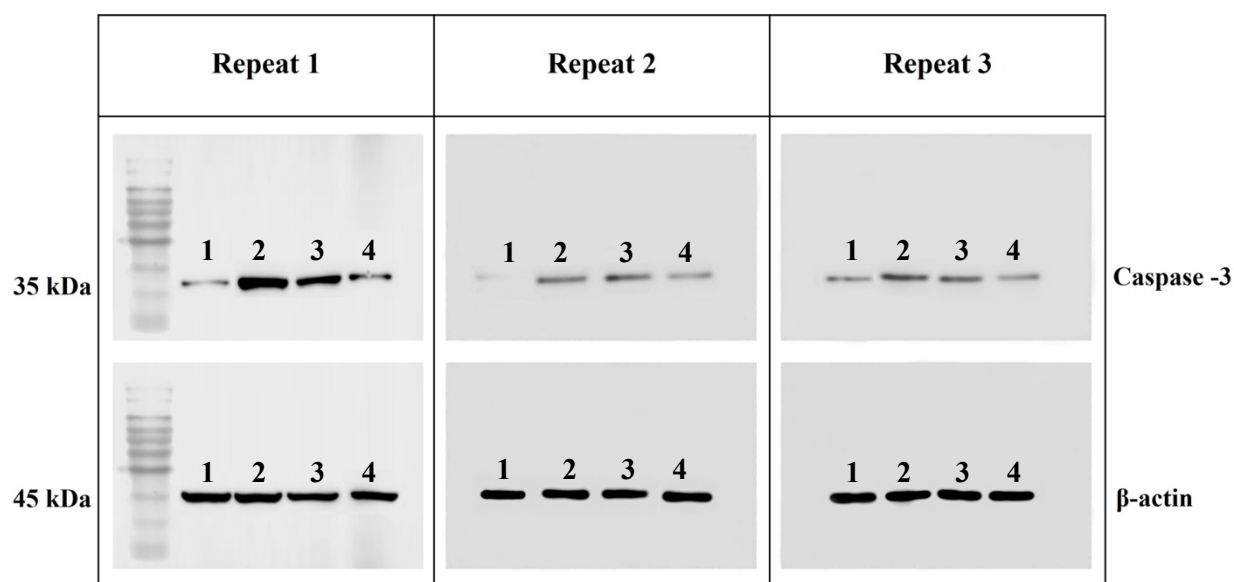

**Figure 7:** The expression of Caspase-3 in the hydrogen peroxide induced SH-SY5Y cell toxicity was detected by Western blotting. (1) naïve control, (2) H<sub>2</sub>O<sub>2</sub> + vehicle, (3) H<sub>2</sub>O<sub>2</sub> + MFML low dose, (4) H<sub>2</sub>O<sub>2</sub> + MFML high dose.

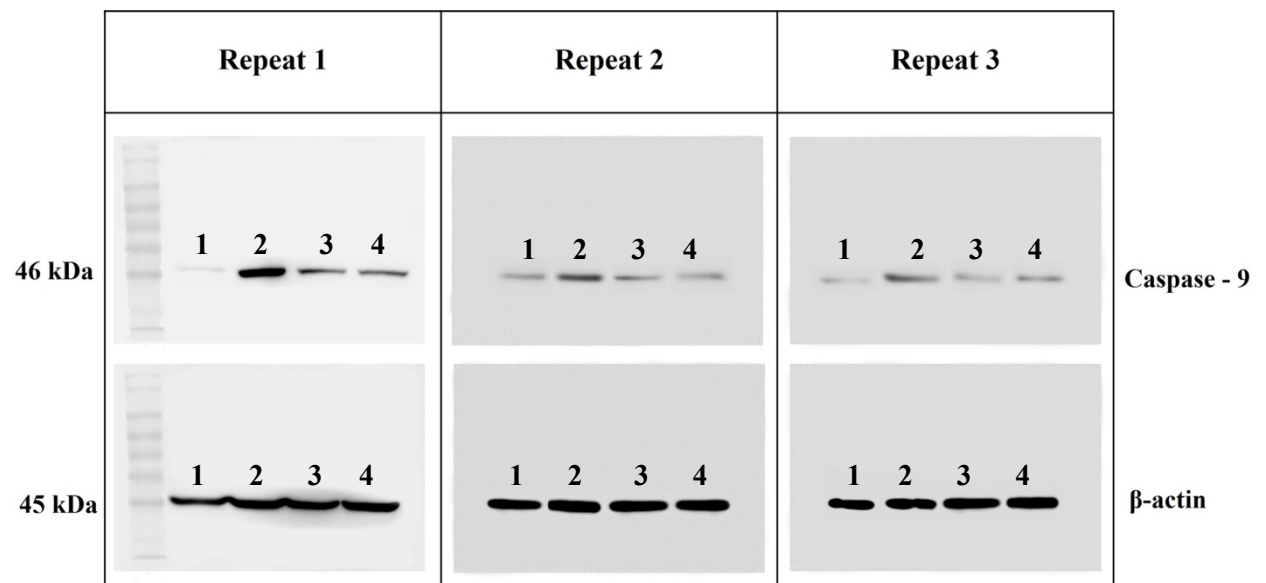

**Figure 8:** The expression of Caspase-9 in the hydrogen peroxide induced SH-SY5Y cell toxicity was detected by Western blotting. (1) naïve control, (2) H<sub>2</sub>O<sub>2</sub> + vehicle, (3) H<sub>2</sub>O<sub>2</sub> + MFML low dose, (4) H<sub>2</sub>O<sub>2</sub> + MFML high dose.
